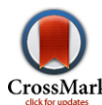

Correction

# Correction: Changing Indications and Socio-Demographic Determinants of (Adeno)Tonsillectomy among Children in England – Are They Linked? A Retrospective Analysis of Hospital Data

The PLOS ONE Staff

There are errors in the Author Contributions. The correct contributions are: Conceived and designed the experiments: EK SS MS. Analyzed the data: EK. Wrote the paper: EK. Design and conception: EK SS MS. Data extraction: JM. Revising the manuscript critically for important intellectual content: EK ABJM MS SS. Guarantors of study: EK and SS.

In the Funding section, there is an error in the third sentence for the funding for author Sonia Saxena. The correct sentence is “SS is funded by a National Institute for Health Research Career Development Fellowship.”

Column 4 of Table 2 is incorrectly missing the age range. The correct age range is 8 to 11 years. The correct version of Table 2 can be viewed below.

The 5<sup>th</sup> sentence of paragraph 4 in the Results section incorrectly includes the phrase “in the ratio of.” The correct sentence is: “Conversely, among children in the 4–15 year age range, those who underwent surgery from the most deprived areas compared with the least deprived areas decreased between these study years and this was most pronounced among children aged 12–15 years (Tables 4 and 5).”

**Table 2.** (Adeno)tonsillectomy by age group and sex in 2011/12 (N = 27732).

| SEX       | Age (years) |        |         |          | Total | P value* |
|-----------|-------------|--------|---------|----------|-------|----------|
|           | <4          | 4 to 7 | 8 to 11 | 12 to 15 |       |          |
| Male (n)  | 3600        | 7322   | 1837    | 1164     | 13923 |          |
| %         | 63          | 55     | 40      | 28       | 50    |          |
| Female(n) | 2120        | 6029   | 2722    | 2938     | 13809 | P<0.001  |
| %         | 37          | 45     | 60      | 72       | 50    |          |
| Total (n) | 5720        | 13351  | 4559    | 4102     | 27732 |          |
| %         | 100         | 100    | 100     | 100      | 100   |          |

Data source: Hospital Episodes Statistics data. \* $\chi^2$  test for linear trend.  
doi:doi:10.1371/journal.pone.0103600.t002

Reference

1. Koshy E, Bottle A, Murray J, Sharland M, Saxena S (2014) Changing Indications and Socio-Demographic Determinants of (Adeno)Tonsillectomy among Children in England – Are They Linked? A Retrospective Analysis of Hospital Data. PLoS ONE 9(8): e103600. doi:10.1371/journal.pone.0103600

**Citation:** The PLOS ONE Staff (2014) Correction: Changing Indications and Socio-Demographic Determinants of (Adeno)Tonsillectomy among Children in England – Are They Linked? A Retrospective Analysis of Hospital Data. PLoS ONE 9(10): e112887. doi:10.1371/journal.pone.0112887

**Published** October 31, 2014

**Copyright:** © 2014 The PLOS ONE Staff. This is an open-access article distributed under the terms of the Creative Commons Attribution License, which permits unrestricted use, distribution, and reproduction in any medium, provided the original author and source are credited.
